# Supplementary material for: Evidence supporting a 1,2-dioxetanone as an intermediate in the benzofuran-2(3H)-one chemiluminescence
Source: Royal Society of Chemistry journal article supplement (doi:10.1039/c3pp50345c), 2013-01-01
Supplement: c3pp50345c.pdf [file c3pp50345c.pdf]

## Supporting Information

### Evidences of a 1,2-dioxetanone as intermediate in the benzofuran-2(3H)-one chemiluminescence

Luiz Francisco M. L. Ciscato,<sup>\*a</sup> Fernando H. Bartoloni,<sup>a</sup> Aline S. Colavite,<sup>a</sup> Dieter Weiss,<sup>b</sup>  
Rainer Beckert<sup>b</sup> and Stefan Schramm<sup>b</sup>

<sup>a</sup> Centro de Ciências Naturais e Humanas, Universidade Federal do ABC, Rua Santa Adélia, 166, Santo André, Brazil. Fax: +55 (11) 44960090; Tel: +55 (11) 40968827; E-mail: luiz.ciscato@ufabc.edu.br

<sup>b</sup> Institut für Organische Chemie und Makromolekulare Chemie, Friedrich-Schiller Universität, Jena, Germany.

**Table S1:** Observed rate constants ( $k_{\text{obs}}$ ) and maximum intensity ( $I_{\text{max}}$ ) for the chemiluminescent emission of **4** in the presence of DBU.

| [DBU] (mM) | $I_{\text{max}}$ (a.u.) | $k_{\text{obs}}$ ( $\text{s}^{-1}$ ) |
|------------|-------------------------|--------------------------------------|
| 10         | 332                     | 0.01283                              |
| 20         | 325                     | 0.01278                              |
| 40         | 332                     | 0.01291                              |
| 60         | 320                     | 0.01209                              |
| 100        | 329                     | 0.01253                              |

[**4**] = 0.1 mM; at 25 °C in acetonitrile. Conditions of fluorescence spectrometer: zero order on emission, PMT at 600 V, 2.5 nm emission slit.

**Table S2:** Observed rate constants ( $k_{\text{obs}}$ ) for the reaction of **4** with DBU at different temperatures followed by UV-Vis spectrophotometry.

| T (°C) | $k_{\text{obs}}$ ( $\text{s}^{-1}$ ) |
|--------|--------------------------------------|
| 21.25  | 0.00924 ± 0.0002                     |
| 25.25  | 0.01251 ± 0.00002                    |
| 31.05  | 0.01593 ± 0.0003                     |
| 37.40  | 0.02183 ± 0.0003                     |
| 43.10  | 0.02802 ± 0.0007                     |
| 49.60  | 0.03654 ± 0.0005                     |
| 57.05  | 0.04316 ± 0.0006                     |

[**4**] = 0.1 mM; [DBU] = 10 mM in acetonitrile. Measured at 376 nm.

**Table S3:** Observed rate constants ( $k_{\text{obs}}$ ) for the reaction of **4** with DBU at different temperatures followed by light emission.

| T (°C) | $k_{\text{obs}}$ ( $\text{s}^{-1}$ ) |
|--------|--------------------------------------|
| 20     | 0.0075 ± 0.0001                      |
| 25     | 0.010 ± 0.001                        |
| 30     | 0.0126 ± 0.0005                      |
| 35     | 0.0154 ± 0.0003                      |
| 40     | 0.0182 ± 0.0002                      |

[**4**] = 0.1 mM; [DBU] = 10 mM in acetonitrile.
